# Supplementary material for: Largely enhanced mechanical properties and heat distortion temperature of β-nucleated isotactic polypropylene by adding ultrafine full-vulcanized powdered rubber
Source: Royal Society of Chemistry journal article supplement (doi:10.1039/c5ra05778g), 2015-01-01
Supplement: c5ra05778g1.pdf [file c5ra05778g1.pdf]

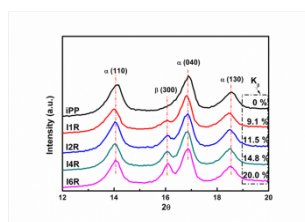

Figure S1 (a) The WAXD spectra and the calculated relative fraction of  $\beta$ -form ( $K_\beta$ ) of various samples taken from injection molded bars.

In order to explore the reasons for the influences of EA-UFPR contents on  $K_\beta$ , the  $\alpha$ -nucleating efficiency of EA-UFPR has been investigated in ternary system (iPP/-EA-UFPR), and the results are presented in Fig. S1. With the adding in EA-UFPR content, the peak of  $\beta$ -crystal emerges and intensities of the peak improve gradually with the further addition of EA-UFPR. In addition, the values of  $K_\beta$  are calculated quantitatively, which are increase continuously with the adding of EA-UFPR. It is suggested that the EA-UFPR plays no role in promoting the formation of  $\alpha$ -crystal because that it can induce the generation of  $\beta$ -crystal during machining process.

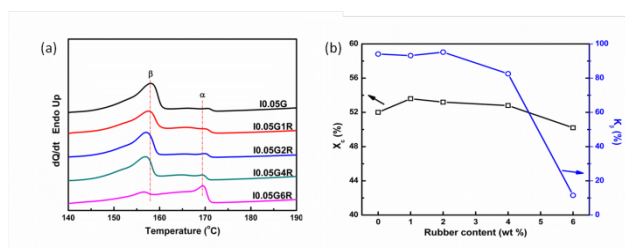

Figure S2 (a) DSC thermograms of heating scans after completely isothermal crystallization at 138 °C, (b) Crystallinity ( $X_c$ ) and  $\beta$  crystal relative content ( $K_\beta$ ) calculated from (a) according to equation (1,2).

For the purpose of judging what is happen after the isothermal crystallization process in detail, the heating scans after isothermal crystallized at 138 °C are exhibited in Fig. S2 (a) and the quantitative  $X_c$  and  $K_\beta$  are presented in Fig. S2 (b). There are no obvious changes in the location of melting peaks of various samples with different EA-UFPR content. However, a significant decrease occurs when the EA-UFPR content reach to 6 wt %. The calculated results shown in Fig S1 (b) illustrate that relative fraction of  $\beta$ -crystals drop sharply in I0.05G6R with a stable  $X_c$ . Besides, the avrami exponent ( $n$ ) of I0.05G6R exhibits significant increase from 3 (I0.05G) to 3.7. Therefore, the sharp decrease of  $K_\beta$  in I0.05G6R is well agrees with the results of  $n$  implying the existence of the mixed growth of  $\alpha$ -crystals and  $\beta$ -crystals.
